# Supplementary material for: CoZn/N-Doped porous carbon derived from bimetallic zeolite imidazolate framework/g-C3N4 for efficient hydrodeoxygenation of vanillin
Source: Royal Society of Chemistry journal article supplement (doi:10.1039/d2cy00642a), 2022-01-01
Supplement: d2cy00642a1.pdf [file d2cy00642a1.pdf]

Electronic Supplementary Material (ESI) for Catalysis Science & Technology.  
This journal is © The Royal Society of Chemistry 2022

## Supporting Information

### **CoZn/N-doped porous carbon derived from bimetallic zeolite imidazolate framework/g-C<sub>3</sub>N<sub>4</sub> for efficient hydrodeoxygenation of vanillin**

Zegang Qiu,<sup>\*a</sup> Xiaoxia He,<sup>a</sup> Zhiqin Li,<sup>a</sup> Qichen Guan,<sup>b</sup> Liang Ding,<sup>a</sup> Yanan Zhu<sup>a</sup> and Yueling Cao <sup>\*b,c</sup>

<sup>a</sup> Xi'an Shiyou University, Xi'an 710065, PR China.

<sup>b</sup> Xi'an Key Laboratory of Functional Organic Porous Materials, School of Chemistry and Chemical Engineering, Northwestern Polytechnical University, Xi'an 710129, PR China.

<sup>c</sup> Chongqing Science and Technology Innovation Center of Northwestern Polytechnical University, Chongqing 401135, PR China

\*Corresponding Authors: qiuzegang@xsyu.edu.cn; yuelingcao@nwpu.edu.cn

**Table S1** Hydrodeoxygenation (HDO) of vanillin to 2-methoxy-4-methylphenol (MMP) over various catalysts in literatures and this work

| Catalysts                                             | Reaction conditions |       |      |                   | Vanillin         | MMP               | Reference | Date |
|-------------------------------------------------------|---------------------|-------|------|-------------------|------------------|-------------------|-----------|------|
|                                                       | T/°C                | p/MPa | t/h  | Solvent           | conversion/<br>% | Selectivity<br>/% |           |      |
| Pd@BC-KFe-800                                         | 65                  | 1     | 2    | n-butanol         | 92.4             | 57.5              | [6]       | 2021 |
| Pd@NH <sub>2</sub> -UiO-66                            | 100                 | 0.5   | 1    | water             | 100              | 100               | [7]       | 2016 |
| <sup>a</sup> Pd-POP                                   | 140                 | 1     | 18   | isopropyl alcohol | 96.5             | 98.2              | [8]       | 2017 |
| Pd/HHT                                                | 50                  | 0.5   | 4    | isopropyl alcohol | 100              | > 99.5            | [9]       | 2021 |
| Pd <sub>1</sub> /WO <sub>2.72</sub>                   | 40                  | 0.1   | 0.25 | ethanol           | 99               | 99                | [10]      | 2021 |
| Ru-PEEK-WC                                            | 75                  | 1.8   | --   | water             | 32.8             | 0                 | [11]      | 2021 |
| Pd Rh/Al <sub>2</sub> O <sub>3</sub>                  | 45                  | 5.6   | 0.5  | isopropyl alcohol | 100              | 100               | [12]      | 2021 |
| Pd/C <sub>vin</sub> ZnCl <sub>2</sub> CO <sub>2</sub> | 100                 | 3     | 3    | water             | 100              | 92                | [13]      | 2020 |
| Pd/Ru @GO                                             | room                | 1     | 24   | methanol          | 100              | 92.3              | [14]      | 2020 |
| <sup>b</sup> Cu <sub>3</sub> Pd@BBA-1                 | 140                 | 1     | 8    | isopropyl alcohol | 99.3             | 93.6              | [15]      | 2018 |
| Co/N-C-600                                            | 150                 | 1     | 8    | isopropyl alcohol | 100              | 99                | [17]      | 2017 |
| Co/Ce@NC                                              | 170                 | 1     | 6    | ethanol           | > 99             | > 99              | [18]      | 2021 |
| Cu/HNZY                                               | 160                 | 1     | 2    | methanol/water    | 100              | 99                | [19]      | 2018 |
| Cu/AC-600                                             | 180                 | 2     | 5    | isopropyl alcohol | 99.9             | 99.1              | [20]      | 2018 |
| Cu/Zn15Al4Sn1-LDH                                     | 180                 | 2     | 4    | isopropyl alcohol | 100              | 98.5              | [21]      | 2019 |
| <sup>c</sup> 4Co-1Zn/NPC                              | 100                 | 1     | 2    | water             | 100              | > 99              | This work |      |

<sup>a</sup>BBA-1: N-rich Porous Organic Polymer

<sup>b</sup>POP: Porous Organic Polymer

<sup>c</sup>HDO of vanillin to MMP over 4Co-1Zn/NPC catalyst in this work is presented for comparison

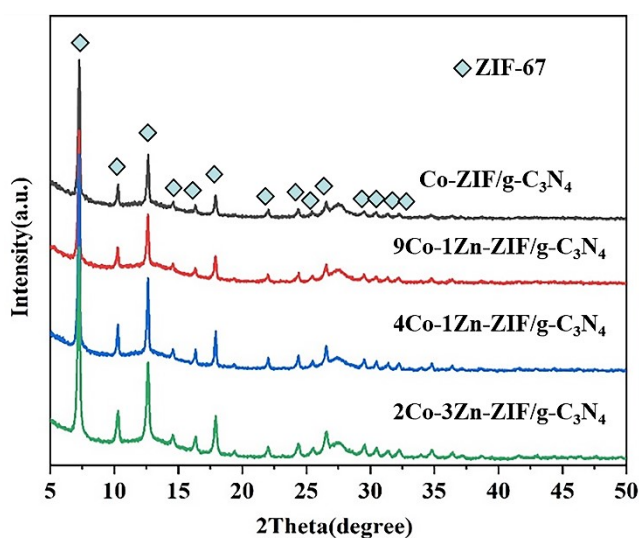

**Fig. S1** XRD patterns of serial Co-Zn-ZIF/g-C<sub>3</sub>N<sub>4</sub> with different ratios of Co/Zn

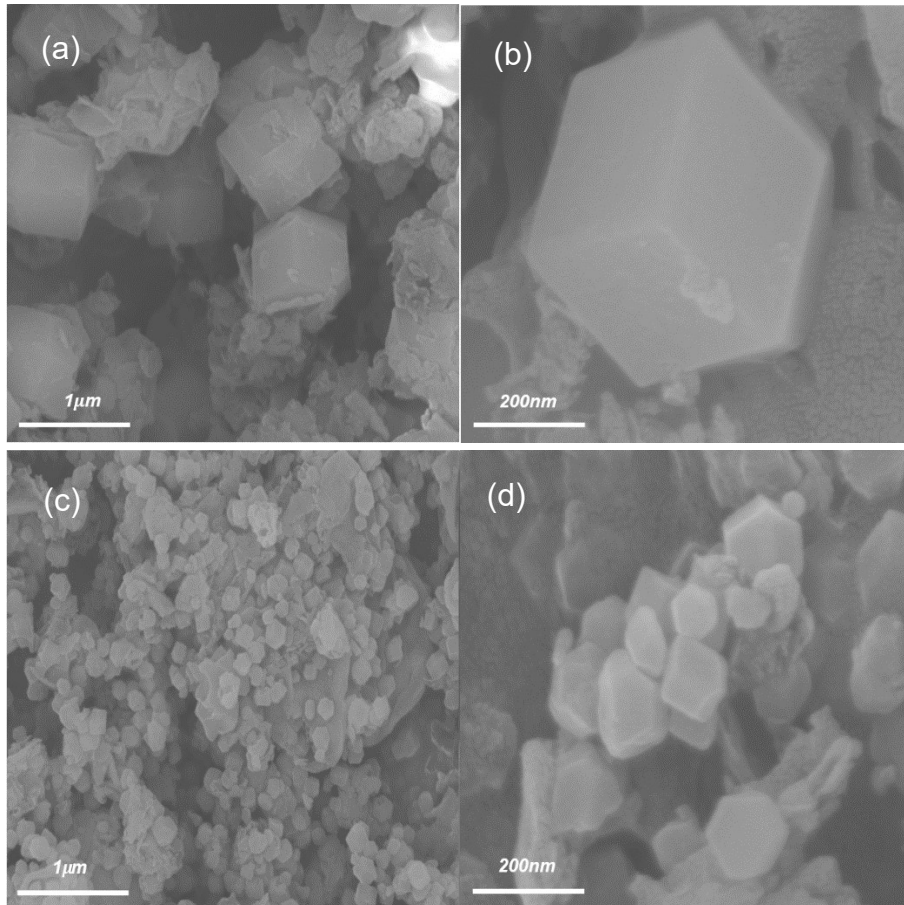

**Fig. S2** SEM images of Co-ZIF/g-C<sub>3</sub>N<sub>4</sub> (a and b) and 4Co-1Zn-ZIF/g-C<sub>3</sub>N<sub>4</sub> (c and d)

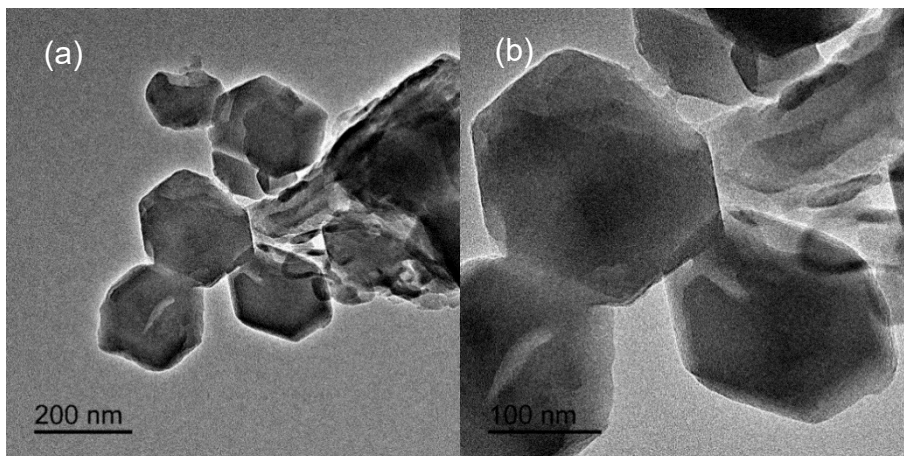

**Fig. S3** TEM images of 4Co-1Zn-ZIF/g-C<sub>3</sub>N<sub>4</sub>

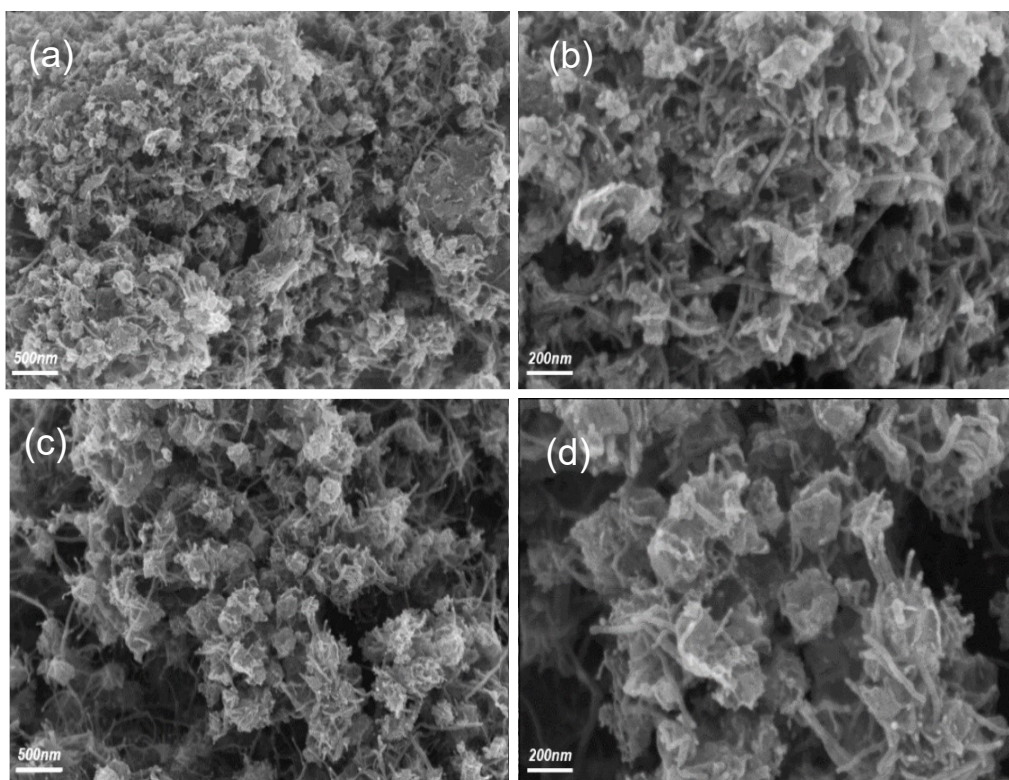

**Fig. S4** SEM images of 9Co-1Zn/NPC (a and b) and 2Co-3Zn/NPC (c and d)

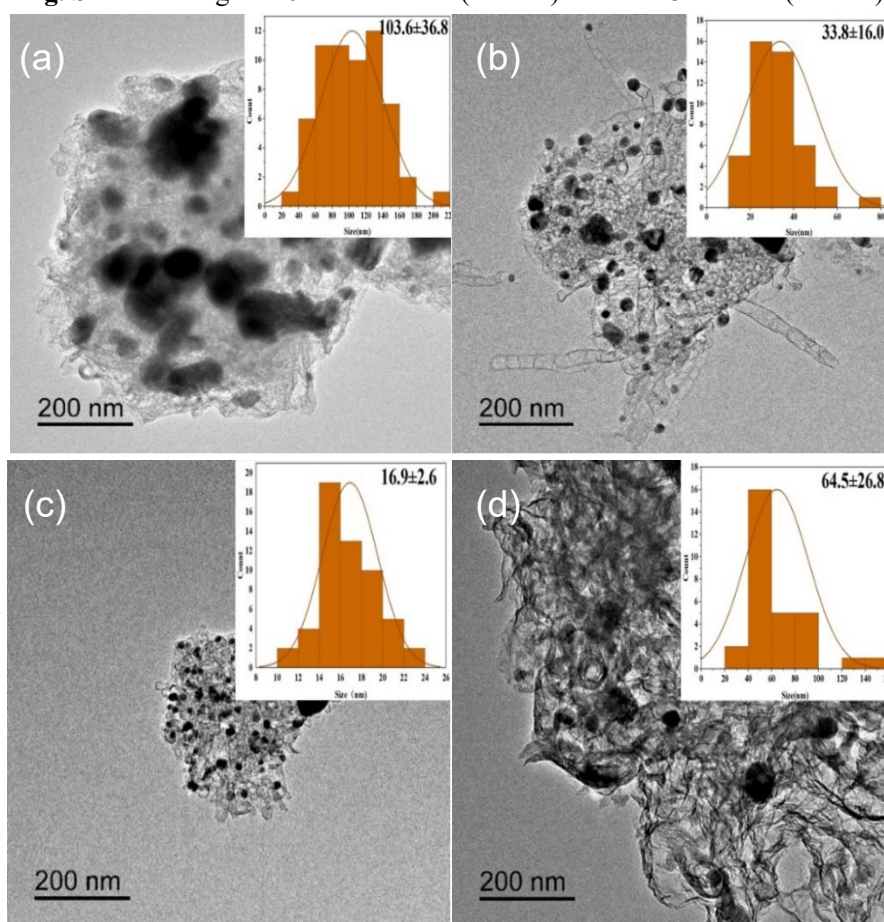

**Fig. S5** TEM images of serial Co-Zn/NPC catalysts with different ratios of Co/Zn

(a) Co/NPC; (b) 9Co-1Zn/NPC; (c) 4Co-1Zn/NPC; (d) 2Co-3Zn/NPC

**Table S2** The content of Co and Zn measured via ICP-AES

| Catalysts   | Co wt./% | Zn wt./% |
|-------------|----------|----------|
| Co/NPC      | 0.48     | --       |
| 9Co-1Zn/NPC | 0.44     | 0.08     |
| 4Co-1Zn/NPC | 0.40     | 0.29     |
| 2Co-3Zn/NPC | 0.22     | 2.50     |

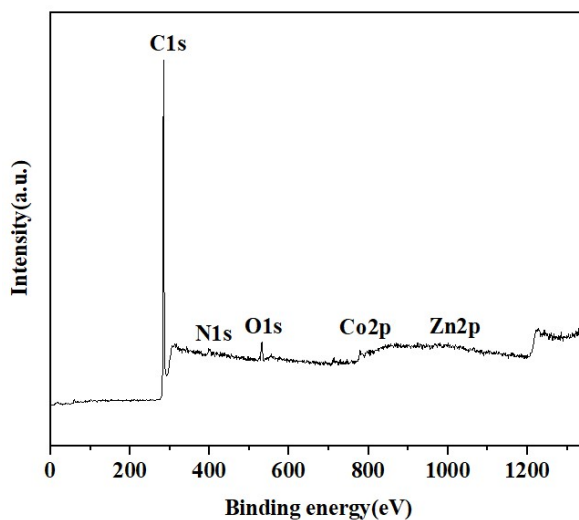

**Fig. S6** XPS survey spectrum of 4Co-1Zn/NPC

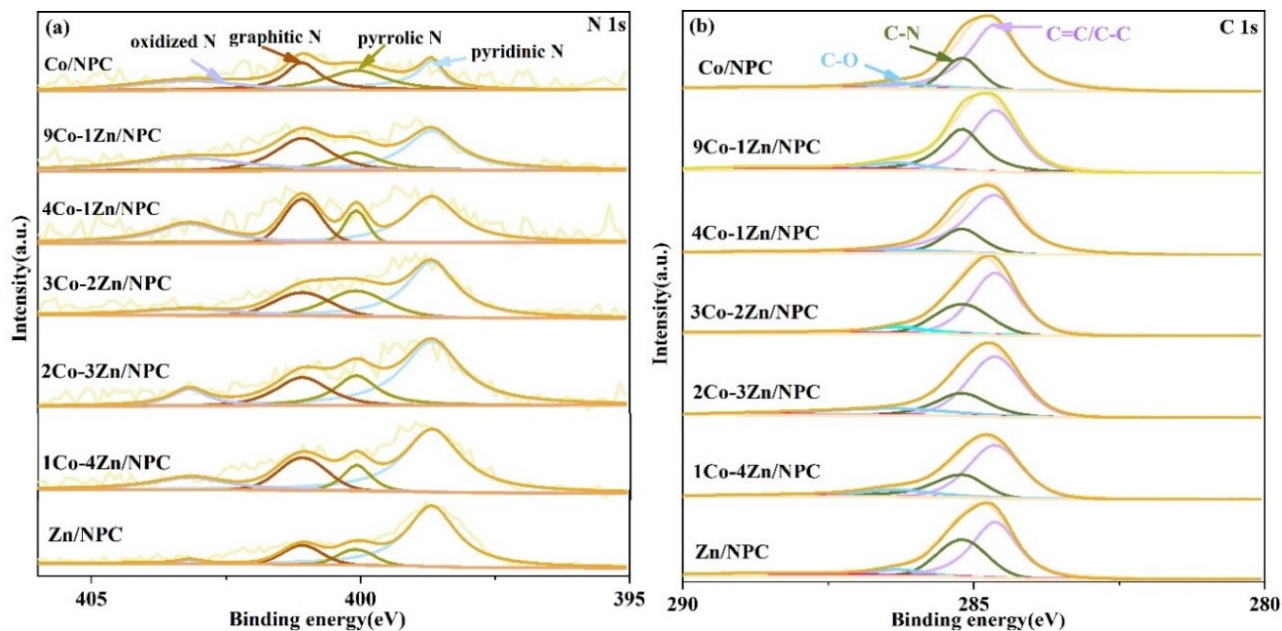

**Fig. S7** XPS spectra of serial Co-Zn/ NPC catalysts with different ratios of Co/Zn

(a) N 1s; (b) C 1s

**Table S3** The content of surface elements obtained from XPS

| Catalysts    | Co/% | Zn/% | C/%   | N/%  | O/%  |
|--------------|------|------|-------|------|------|
| Co/NPC       | 0.50 | --   | 93.31 | 3.35 | 2.84 |
| 9Co-1Zn/NPC  | 0.44 | 0.13 | 91.77 | 2.52 | 5.14 |
| 4Co-1Zn/NPC  | 0.61 | 0.42 | 91.80 | 3.72 | 3.45 |
| 3Co-2Zn/ NPC | 0.87 | 0.74 | 87.01 | 6.14 | 5.24 |
| 2Co-3Zn/NPC  | 0.64 | 0.40 | 89.19 | 4.57 | 5.20 |
| 1Co-4Zn/ NPC | 0.76 | 0.56 | 88.19 | 5.98 | 4.51 |

**Table S4** Hydrodeoxygenation of Vanillin to 2-methoxy-4-methylphenol (MMP) over different catalysts

| Catalysts   | Vanillin      | MMP            | HMP            |
|-------------|---------------|----------------|----------------|
|             | Conversion /% | Selectivity /% | Selectivity /% |
| Co/CN       | 100           | 36.1           | 63.9           |
| Co/NPC      | 100           | 48.5           | 51.5           |
| 4Co-1Zn/CN  | 100           | 88.5           | 11.5           |
| 4Co-1Zn/NPC | 100           | 99.0           | 1.0            |

Reaction conditions: catalyst 20 mg, vanillin 0.5 mmol, H<sub>2</sub>O 5 mL, 110 °C, 1 MPa H<sub>2</sub>, 2 h

Co/CN and 4Co-1Zn/CN: N-doped carbon catalysts without the adding of g-C<sub>3</sub>N<sub>4</sub>

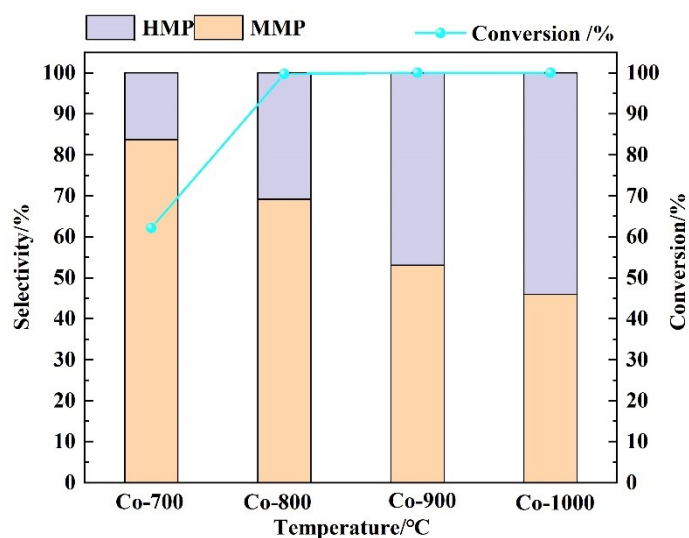**Fig. S8** Influence of pyrolyzing temperatures on hydrodeoxygenation reaction of vanillin over Co/NPC

Co-700, Co-800, Co-900, Co-1000: Co/NPC catalysts pyrolyzed at 700°C, 800°C, 900°C, 1000°C

MMP: 2-methoxy-4-methylphenol; HMP: 4-Hydroxy-3-methoxybenzyl alcohol

Reaction conditions: catalyst 20 mg, Vanillin 0.5 mmol, H<sub>2</sub>O 5 mL, 110 °C, 1 MPa

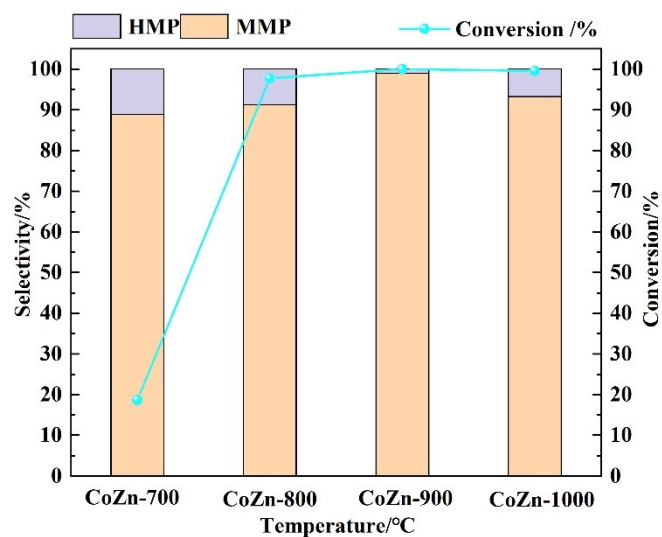

**Fig. S9** Influence of pyrolyzing temperatures on hydrodeoxygenation reaction of vanillin over 4Co-1Zn/NPC

CoZn-700, CoZn-800, CoZn-900, CoZn-1000: 4Co-1Zn/NPC pyrolyzed at 700°C, 800°C, 900°C, 1000°C

MMP: 2-methoxy-4-methylphenol; HMP: 4-Hydroxy-3-methoxybenzyl alcohol

Reaction conditions: catalyst 20 mg, Vanillin 0.5 mmol, H<sub>2</sub>O 5 mL, 110 °C, 1 MPa
